# Supplementary material
Source: Research Square preprint supplement (doi:10.21203/rs.3.rs-9031795/v1)
Supplement: Supplementary file 1 [file 028ebcb79f61e34dce6f94f5.docx]

**Additional file 2: The direct non-medical costs incurred by participants and informal caregivers (per visit) - with standard deviation**

|  | Participants from HCMC | | | Participants from outside HCMC | | All participants | |
| --- | --- | --- | --- | --- | --- | --- | --- |
| **Mean** | | **Standard deviation** | **Mean** | **Standard deviation** | **Mean** | **Standard deviation** |
| Participants without caregivers | | | | | |  | |
| Travel cost | 1.20 | | 5.94 | 6.67 | 3.99 | 3.67 | 5.80 |
| Food cost | 1.26 | | 0.64 | 1.45 | 1.26 | 1.35 | 0.97 |
| Other costsa | 0.01 | | 0.07 | 0.02 | 0.08 | 0.01 | 0.08 |
| Total direct non-medical costs | **2.48** | | 5.99 | **8.13** | 4.26 | **5.03** | 5.95 |
| Participants with caregivers | | | | | | | |
| Travel cost | 0.00 | | 0.01 | 13.96 | 10.12 | 9.78 | 10.62 |
| Food cost | 2.36 | | 2.20 | 3.29 | 3.01 | 3.01 | 2.80 |
| Other costsa | 0.40 | | 1.24 | 0.15 | 2.47 | 0.22 | 0.83 |
| Total direct non-medical costs | **2.76** | | 2.35 | **17.40** | 10.79 | **13.01** | 11.33 |
| All participants | | | | | | | |
| Travel cost | 0.89 | 5.12 | | 10.31 | 5.12 | 6.06 | 8.54 |
| Food cost | 1.55 | 1.31 | | 2.37 | 2.47 | 2.00 | 2.06 |
| Other costsa | 0.11 | 0.64 | | 0.08 | 0.43 | 0.10 | 0.53 |
| Total direct non-medical costs | **2.55** | 5.26 | | **12.77** | 9.38 | **8.16** | 9.29 |
| a*Other cost includes parking fees (if they used their own vehicle) and any other non-medical costs incurred during the visit to the hospital*  *HCM: Ho Chi Minh City* | | | | | | | |
