# Supplementary material
Source: Research Square preprint supplement (doi:10.21203/rs.3.rs-9031795/v1)
Supplement: Supplementary file 2 [file 02f8b3311ac814e25ebeb95f.docx]

|  | Participants from HCMC | | | Participants from outside HCMC | | | Overall sample | | |
| --- | --- | --- | --- | --- | --- | --- | --- | --- | --- |
|  | Participants only | Outpatient with caregivers | Average | Participants only | Outpatient with caregivers | Average | Participants only | Outpatient with caregivers | Average |
| Valued based on the GDP per capita | 28.48 | 47.44 | 33.42 | 72.18 | 142.10 | 107.14 | 52.52 | 99.51 | 73.94 |
| Valued based on the minimum wage | 20.48 | 32.56 | 23.63 | 50.66 | 101.62 | 76.14 | 37.08 | 70.54 | 52.51 |
| Valued based on the average wage of the job category the participants reported | 21.77 | 34.76 | 25.16 | 56.95 | 113.00 | 84.97 | 41.12 | 77.80 | 58.06 |
| Valued based on the average wage of where the participants live | 32.34 | 54.63 | 38.16 | 69.70 | 137.42 | 103.56 | 52.89 | 100.17 | 74.13 |
| *HCMC: Ho Chi Minh City*  *Results assume that three visits are required for standard treatment.* | | | | | | | | | |

**Additional file 4: The total costs incurred by participants accessing standard 12 week treatment with DAA, stratified by productivity cost method**
