# Supplementary material
Source: Research Square preprint supplement (doi:10.21203/rs.3.rs-9031795/v1)
Supplement: Supplementary file 3 [file 8efbc4d2ddea7594bdd12549.docx]

**Outpatient visit costing questionnaire**

| **A: General** |
| --- |
| **A1**: **Follow up number** [__________]  **A2**: **Questionnaire number** [________]  **A3**: **Patient number** [_________] |
| **A4: Time at start of interview** *- 24h format* [_____|______] Hours [_____|______] Minutes |
| **A5: Date of interview** *- dd/mm/yy* [_____|______] **/** [_____|______] **/** [_____|______] |
| **A6: Who is the interviewee**  **[1]** The patient **[2]** Relatives/caregiver **[3]** Other - specify …………………………….  **A7:** W**ho go with patient this visit?**  **[1]** Only patient **[2]** Relatives/caregiver **[3]** Friends |
| **B: Patient information** |
| **B1: Patient first name:** …………………………………………………………………. |
| **B2: Gender of patient [1]** *Male*  **[2]** *Female* |
| **B3: Year of birth of the patient** (yyyy) [_____|______|_____|______] |
| **B4: Patient’s marital status**  **[1]** Married, **[2]** Single, **[3]** Separated/Divorced, **[4]** Widow, [**5]** Other-specify………………………………… |
| **B5: Province they are living in?** [_________________________________________________] |
| **B6: How many people in the patient’s household?** [____|____] Adults [____|____] Children (< 15years) |
| **B7: What is the average monthly income of the patient’s household?**  [______________________________] ngan VND Don’t know |
| **C: Patients current employed status** |
| **C1: Which of the options best describes your current employment status?** *– Circle the most relevant number (only one).*  **[1]** Paid work (full time)-> go to C2  **[2]** Paid work (part time) -> go to C2  **[3]** Looking after a home/family -> go to C5  **[4]** Student/pupil -> go to C5  **[5]** Doing subsistence farming (unpaid) -> go to C5  **[6]** Unemployed, -> go to C5  **[7]** Retired -> go to C5  **[8]** Other - specify…..……………………………………………………………… -> go to C5 |
| **For the patients that do paid work (either full or part time)**  **C2**: **Specify job** ………………………….……………………………………………………………  Don’t know  **C3: Monthly average income (money patient received) ?** [____________] ngan VND  Don’t know  **C4: Average number of hours in official work per week? -***Count only the hours that they get paid****.***  [_____|_____] hours per week  Don’t know |
| **C5: For all Patients What would you have been doing as your main activity if you had not come to the outpatient facility** *– Circle the most relevant number (only one).*  **[1]** Paid work  **[2]** Household chores, caring for children or relative **[3]** Leisure activities (i.e. activities for relaxation) **[4]** Voluntary work or caring for a friend **[5]** Attending school or university **[6]** Doing subsistence farming (unpaid)  **[7]** Seeking work,  **[8]** Other (specify)……………………………………………..………. |
| **D: Insurance** |
| **D1: Do you have health insurance?**  **[1]** YES -> go to D2   **[2]** NO – go to Section E |
| **Used health health insurance:**  **D2: What type of health insurance you have?**  **[1]** Only government health insurance, **[2]** Only private health insurance**, [3]** Combination of both (government and private), **[4]** Other - specify…………..………………………………………….  Don’t know  **D3: Information of government health insurance**  Type of health insurance: ……………………  or the number of insurance: (two first letter and one number) [_____|_____] [____]  Don’t know  **D4: What co-payment percentage did the insurance cover?**  **D4.1** Government insurance [______] %  Don’t know  Don’t have this type  **D4.2** Private insurance [______] %  Don’t know  Don’t have this type |
| **E: Duration of visit** |
| **E1: What time did you arrive hospital this visit?**  [_____|______] Hours [______|______] Minutes  Don’t know  **E2: How long did you wait to see the doctor/nurse?**  [_____|______] Hours [______|______] Minutes  Don’t know |
| **E3: How long did the health exam take (the time that doctor or nurse examines patient) in total?**  [_____|______] Hours [______|______] Minutes  Don’t know |
| **F: Travel and subsidence** |
| **F1: Approximately how far did you travel to get to the facility?**  [___________] kilometers  Don’t know |
| **F2: What was main method of transportation you used? -** *– Circle the most relevant number (only one).*  **[1]** *Walking,* **[2]** *Bicycle,* **[3]** *Own motorbike*, **[4]** *Own car,* **[5]** *Taxi,*  **[6]** *Bus,* **[7]** *Grab bike(or similar technology) ,* **[8]** Grab car (or similar technology)  **[9]** *Other - specify*………………………………………… |
| **F3: How much did it cost (one way) -** *Not including parking fees or your fuel costs. If not need to pay, write 0*. If patients said that clinical trial program pay money for them, ask the actual money they pay directly for travel.  [______________________________] ngan VND Don’t know |
| **F4: Do you pay a parking fee?** *- If not need to pay, write 0*  [______________________________] ngan VND  Don’t know |
| **F5: How long did you spend traveling to the outpatient facility (one way)?**  [_____|______] Hours [______|______] Minutes  Don’t know |
| **F6: If the caregivers traveled separately, were there any extra travel costs incurred by them (one way)?** - *If no, write 0*  [______________________________] ngan VND Don’t know |
| **F7: What were the total food expenses (for both patients and caregivers)?** *- If none, write 0*  [______________________________] ngan VND Don’t know |
| **F8: Did you or your caregivers incur any costs for accommodation?**  **[1]** Yes- I/caregivers paid by myself, add amount: [_______________] ngan VND  Don’t know  **[2]** No- I/caregivers have to stay at hostel/hotel but clinical trial program rent for me  **[3]** No- I/caregivers go home, don’t need to stay at hostel/hotel |
| **F9: Patient/Caregivers pay any others cost in this time visit? (fee for fixing vehicle, buying lottery…….)?** - *If no, write 0*  [______________________________] *ngàn VND*  Don’t know |
| **G: The bill** |
| **G1: Any other medication or medical costs incurred during this visit (vitamin …) NOT included in clinical trial programs**  **[1]** YES – name of medication:……………………………………………………….-> go to G2  [**2]** NO -> go to Section H  **G2: IF You have paid, add amount** [___________________________] ngan VND  Don’t know |
| **H: Informal caregivers** |
| **Informal caregivers are any relative, partner or, friend who has assisted you while you have been ill WITHOUT PAY.**  **H1: Did any informal caregivers come to the outpatient facility with you?**  **[1]** YES -> go to H2  **[2]** NO –> go to Section I  **H2: IF YES how many (not including paid caregivers)?** [_________] |
| **H3: For each of these caregivers indicate their relationship with you?** *Add the relevant type of relationship from the list below into the bracket for each potential caregiver. e.g. Caregiver #1: [Mother]*  **[1]** Mother, **[2]** Father, **[3]** Partner /spouse, **[4]** Sibling, **[5]** Other relatives, **[6]** Friend, **[7]** Other (specify)  Caregiver #1**:** [_________]  Caregiver #2: [_________]  *For the following questions, use the same caregiver number (i.e. caregiver#1) to refer to the same caregiver as this question. Refer the patient back to their answers to this question if needed.* |
| **H4: How long did each caregiver spend traveling to the outpatient facility (one way)?**  Caregiver #1**:** [_____|______] Hours [_____|______] Minutes  Don’t know  Caregiver #2: [_____|______] Hours [_____|______] Minutes  Don’t know |
| **H5: How many hours did each caregiver spend with you at the outpatient facility?**  Caregiver #1**:** [_____|______] Hours  Don’t know  Caregiver #2**:** [_____|______] Hours  Don’t know |
| **H6: What is the caregiver’s current employment status -** *Add the most relevant number from the list below in to the brackets for each caregiver.*  **[1]** Paid work (full time) -> go to H7  **[2]** Paid work (part time) -> go to H7  **[3]** Looking after a home/family -> go to H10  **[4]** Student/pupil -> go to H10  **[5]** Doing subsistence farming (unpaid) -> go to H10  **[6]** Unemployed -> go to H10  **[7]** Retired -> go to H10  **[8]** Other (specify)…………………………. -> go to H10  Caregiver #1**:** [_________]  Don’t know  Caregiver #2: [_________]  Don’t know |
| **H7: For the caregivers that do paid work: Specify job**  Caregiver #1**:** …………………………………………..  Caregiver #2**:** …………………………………………..  **H8: For the caregivers that do paid work: What is their monthly average income (money they received)?**  Caregiver #1**:** [_____________________] ngan VND  Don’t know  Caregiver #2**:** [_____________________] ngan VND  Don’t know  **H9: For the caregivers that do paid work: How many hours per week do they spend doing paid work -** *Count only the hours that they get paid. If they do not do paid work tick the relevant box.*  Caregiver #1**:** [_____|______] Hours per week  Don’t know  Caregiver #2**:** [_____|______] Hours per week  Don’t know |
| **H10: What would the caregivers have been doing as their main activity if they had not come to the outpatient facility -** *Add the most relevant number from the list below in to the brackets for each caregiver (only choose the most relevant option).*  **[1]** Paid work  **[2]** Household chores, caring for children or relative  **[3]** Leisure activities (i.e. activities for relaxation)  **[4]** Voluntary work or caring for a friend  **[5]** Attending school or university  **[6]** Doing subsistence farming (unpaid)  **[7]** Seeking work  **[8]** Other (specify)……………………….    Caregiver #1**:** [_____________________]  Don’t know  Caregiver #2: [_____________________]  Don’t know |

| **I: General** |
| --- |
| **I1: Time at end of questionnaire** *-24h format* [_____|______]Hours [_____|______] Minutes |
