# Supplementary material
Source: Research Square preprint supplement (doi:10.21203/rs.3.rs-9031795/v1)
Supplement: Supplementary file 4 [file fecd7e65e999414734d1005c.docx]

**Additional file 3: Average total productivity lost per visit**

|  | Total mean hours of productivity lost per visit | Standard Deviation |
| --- | --- | --- |
| Participants from HCMC | | |
| Participants only | 4.0 | 0.8 |
| Participants with caregivers | 9.0 | 3.5 |
| Mean | 4.8 | 2.0 |
| Participants from outside-HCMC | | |
| Participants only | 7.5 | 2.1 |
| Participants with caregivers | 16.9 | 5.7 |
| Mean | 12.9 | 6.2 |
| Whole sample |  |  |
| Overall mean | 9.3 | 6.2 |
| *HCMC: Ho Chi Minh City* |  |  |


